# Supplementary material
Source: PubMed Central journal article supplement (PMC4304758)
Supplement: f-71-00103-sup1.pdf [file f-71-00103-sup1.pdf]

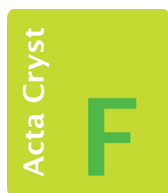

STRUCTURAL BIOLOGY  
COMMUNICATIONS

**Volume 71 (2015)**

**Supporting information for article:**

**Purification, crystallization and preliminary X-ray diffraction analysis of SpaD, a backbone-pilin subunit encoded by the fimbrial *spaFED* operon in *Lactobacillus rhamnosus* GG**

**Priyanka Chaurasia, Ingemar von Ossowski, Airi Palva and Vengadesan Krishnan**

**Table S1** Homologs of SpaD available in the PDB identified by psi-blast search tool. Top hits were arranged based on the on E-value.

| PDBid | Sequence identities (%),<br>residue range | E-value | Description                                                                      |
|-------|-------------------------------------------|---------|----------------------------------------------------------------------------------|
| 3PG2  | 24, 171-436                               | 5e-07   | C-terminal fragment of GBS80 backbone pilin from <i>Streptococcus agalactiae</i> |
| 3UXF  | 27, 7-155                                 | 5e-06   | Fimbrial protein FimP from <i>Acinomyces oris</i>                                |
| 4P0D  | 22, 37-439                                | 0.002   | Backbone pilin T6 from <i>Streptococcus pyogenes</i>                             |
| 2WW8  | 25, 290-431                               | 0.005   | Pilus adhesion RrgA from <i>Streptococcus pneumonia</i>                          |

**Table S2** Phasing statistics.

|                                     | Initial 19 sites | Deduced 39 sites |
|-------------------------------------|------------------|------------------|
| CC (all/weak) <sup>§</sup>          | 38.2/20.4        |                  |
| Phasing power <sup>#</sup>          | 1.27             | 1.46             |
| R <sub>cu</sub> <sup>#</sup>        | 0.75             | 0.71             |
| FOM (centric/acentric) <sup>#</sup> | 0.38/0.13        | 0.41/0.14        |

<sup>§</sup>The correlation coefficient as defined by *SHELXD* used within *autoSHARP*.

<sup>#</sup>as reported by *SHARP*.

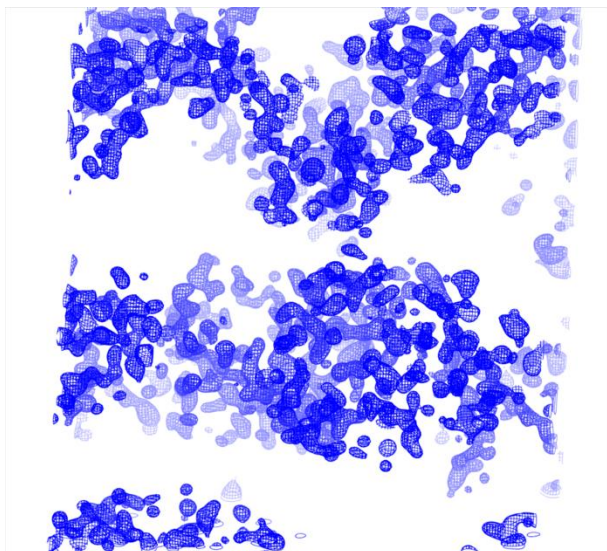

**Figure S1** Experimental electron density map of 20Å section showing a clear solvent boundary after density modification (contoured at  $1.5\sigma$  level).
